# Supplementary material
Source: Copernicus journal article supplement (doi:10.5194/ms-17-629-2026)
Supplement: Supplementary file [file ms-17-629-2026-supplement-title-page.pdf › ms-17-629-2026-supplement-title-page.pdf]

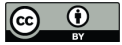

*Supplement of*

## **Multi-objective structural optimization of submarine cable pallet based on Kriging-MOPSO**

**Yuze Wang et al.**

*Correspondence to:* Lijie Zuo (zuoliji@126.com) and Changfang Zou (zchf1983@aliyun.com)

- ms-17-629-2026-supplement-title-page.pdf
- supplementary Data
  - supplementary Data-1.txt
  - supplementary Data-2.txt

The copyright of individual parts of the supplement might differ from the article licence.
